# Supplementary material for: Impact of mass distribution of long-lasting insecticidal nets (LLINs) in Mozambique, 2011 to 2025: Retrospective and prospective modeling of child mortality and lives saved
Source: Research Square preprint supplement (doi:10.21203/rs.3.rs-126233/v1), 2020-12-16
Supplement: Supplementary file 1 [file 9f62e59667716c0dc81732ec.xlsx]

## Sheet: Additional File 1. 
Additional File 1. Estimated annual LLIN replacement needs by province, 2020 to 2030
Province	2020	2021	2022	2023	2024	2025	2026	2027	2028	2029	2030
Nampula	0	0	1.05207e+06	1.32576e+06	1.10954e+06	1.03769e+06	1.07126e+06	1.13734e+06	1.18756e+06	1.2173e+06	1.24383e+06
Niassa	0	0	0	0	436374	455207	353377	329964	352158	379839	394869
Cabo Delgado	0	0	414112	516226	430824	403312	416957	442785	462162	473604	483903
Zambezia	0	0	474559	1.18242e+06	1.08985e+06	1.043e+06	1.0435e+06	1.07729e+06	1.12233e+06	1.16104e+06	1.19165e+06
Tete	0	0	48710.2	636133	561346	518856	511151	528423	553981	574751	589403
Manica	0	0	197774	457380	418731	401753	403293	416732	433873	448561	460361
Sofala	0	0	177821	516464	471036	447874	447207	461996	481811	498602	511647
Inhambane	0	0	273077	345676	338189	336708	341424	351412	363805	375439	385753
Gaza	0	0	240637	329758	321097	317572	321163	330670	342682	353795	363462
Maputo Province	81942.1	697868	259949	286667	320657	347765	361644	367338	373757	384316	396757
Total	81942.1	697868	3.13871e+06	5.59648e+06	5.49765e+06	5.30973e+06	5.27098e+06	5.44395e+06	5.67413e+06	5.86725e+06	6.02164e+06
